# Supplementary material for: Integration and Gene Co-Expression Network Analysis of scRNA-seq Transcriptomes Reveal Heterogeneity and Key Functional Genes in Human Spermatogenesis
Source: Research Square preprint supplement (doi:10.21203/rs.3.rs-611284/v1), 2021-06-15
Supplement: Supplementary file 1 [file 85aac023a0520d0d1eda0404.xlsx]

## Sheet: Sheet1
Results ranked by Betweenness(Weight)
1	C1orf194	Betweenness(Weight): 51232.0
2	HSP90AB1	Betweenness(Weight): 38973.0
3	MFSD6L	Betweenness(Weight): 16699.0
4	TPD52L3	Betweenness(Weight): 12394.0
5	PTMA	Betweenness(Weight): 9909.0
6	PHF7	Betweenness(Weight): 7291.0
7	BOLL	Betweenness(Weight): 5299.0
8	TEX40	Betweenness(Weight): 5068.0
9	C6orf48	Betweenness(Weight): 4350.0
10	NDUFAF3	Betweenness(Weight): 3948.0
11	DAW1	Betweenness(Weight): 3883.0
12	HSPA2	Betweenness(Weight): 3832.0
13	RPSA	Betweenness(Weight): 3824.0
14	SYCP2	Betweenness(Weight): 3749.0
15	HSP90AA1	Betweenness(Weight): 3557.0
16	ACTG1	Betweenness(Weight): 3171.0
17	ZNF428	Betweenness(Weight): 2702.0
18	GS1-259H13.2	Betweenness(Weight): 2425.0
19	SPATA8	Betweenness(Weight): 2178.0
20	RPS19	Betweenness(Weight): 2161.0
21	SMC3	Betweenness(Weight): 2147.0
22	SRP9	Betweenness(Weight): 1873.0
23	FAM216A	Betweenness(Weight): 1782.0
24	C15orf43	Betweenness(Weight): 1727.0
25	TKTL2	Betweenness(Weight): 1578.0
26	HORMAD1	Betweenness(Weight): 1484.0
27	ZBTB32	Betweenness(Weight): 1411.0
28	FTH1	Betweenness(Weight): 1319.0
29	CALM2	Betweenness(Weight): 1230.0
30	ZMYND10	Betweenness(Weight): 1214.0
31	RCN2	Betweenness(Weight): 1146.0
32	CCNI	Betweenness(Weight): 1095.0
33	SNRPC	Betweenness(Weight): 1070.0
34	ZCWPW1	Betweenness(Weight): 1010.0
35	CKS2	Betweenness(Weight): 1004.0
36	NASP	Betweenness(Weight): 736.0
37	REXO2	Betweenness(Weight): 717.0
38	RPL18A	Betweenness(Weight): 680.0
39	CETN3	Betweenness(Weight): 663.0
40	HMGA1	Betweenness(Weight): 618.0
41	ADAM18	Betweenness(Weight): 613.0
42	GLTSCR2	Betweenness(Weight): 597.0
43	CETN1	Betweenness(Weight): 579.0
44	ART3	Betweenness(Weight): 571.0
45	PPP3R2	Betweenness(Weight): 553.0
46	LINC01206	Betweenness(Weight): 540.0
47	LINC00865	Betweenness(Weight): 488.0
48	SMARCB1	Betweenness(Weight): 472.0
49	YEATS4	Betweenness(Weight): 468.0
50	SPATA22	Betweenness(Weight): 453.0
51	TUBA3C	Betweenness(Weight): 348.0
52	MRFAP1	Betweenness(Weight): 345.0
53	SPDYA	Betweenness(Weight): 322.0
54	C1QBP	Betweenness(Weight): 315.0
55	DMRTB1	Betweenness(Weight): 295.0
56	DCAF15	Betweenness(Weight): 291.0
57	TEX264	Betweenness(Weight): 291.0
58	POLR2E	Betweenness(Weight): 289.0
59	VIMP	Betweenness(Weight): 287.0
60	EGFL7	Betweenness(Weight): 263.0
61	KDM5B	Betweenness(Weight): 257.0
62	CUTC	Betweenness(Weight): 248.0
63	LDHC	Betweenness(Weight): 242.0
64	ZPBP2	Betweenness(Weight): 238.0
65	CCNA1	Betweenness(Weight): 189.0
66	DYNLT1	Betweenness(Weight): 180.0
67	VCX2	Betweenness(Weight): 173.0
68	TBL2	Betweenness(Weight): 143.0
69	ARL3	Betweenness(Weight): 134.0
70	ANKRD7	Betweenness(Weight): 133.0
71	RPS2	Betweenness(Weight): 126.0
72	PEBP1	Betweenness(Weight): 122.0
73	RTCB	Betweenness(Weight): 109.0
74	EIF4A2	Betweenness(Weight): 107.0
75	DHFR	Betweenness(Weight): 105.0
76	USP11	Betweenness(Weight): 105.0
77	H2AFZ	Betweenness(Weight): 94.0
78	COMMD4	Betweenness(Weight): 82.0
79	RPL10A	Betweenness(Weight): 69.0
80	RPLP1	Betweenness(Weight): 64.0
81	LINC00654	Betweenness(Weight): 62.0
82	DBF4	Betweenness(Weight): 54.0
83	LY6K	Betweenness(Weight): 48.0
84	RBBP4	Betweenness(Weight): 45.0
85	LVCAT1	Betweenness(Weight): 42.0
86	RPL39L	Betweenness(Weight): 38.0
87	SNW1	Betweenness(Weight): 37.0
88	BTG3	Betweenness(Weight): 36.0
89	FAM150B	Betweenness(Weight): 32.0
90	VCX	Betweenness(Weight): 28.0
91	TDRG1	Betweenness(Weight): 28.0
92	HIST1H4C	Betweenness(Weight): 28.0
93	COX20	Betweenness(Weight): 20.0
94	ADAM2	Betweenness(Weight): 14.0
95	SPINK2	Betweenness(Weight): 13.0
96	MKKS	Betweenness(Weight): 12.0
97	FKBP6	Betweenness(Weight): 6.0
98	SQLE	Betweenness(Weight): 6.0
99	RPS11	Betweenness(Weight): 4.0
100	HNRNPA2B1	Betweenness(Weight): 4.0
101	TCP10	Betweenness(Weight): 4.0
102	COX8A	Betweenness(Weight): 2.0
103	DUT	Betweenness(Weight): 2.0
104	BIRC5	Betweenness(Weight): 2.0
105	CCDC112	Betweenness(Weight): 2.0
106	BCAP31	Betweenness(Weight): 2.0
107	RASGRP2	Betweenness(Weight): 0.0
108	SYNE2	Betweenness(Weight): 0.0
109	CCDC3	Betweenness(Weight): 0.0
110	KLF6	Betweenness(Weight): 0.0
111	FAM9B	Betweenness(Weight): 0.0
112	PNMA5	Betweenness(Weight): 0.0
113	SNHG19	Betweenness(Weight): 0.0
114	CTHRC1	Betweenness(Weight): 0.0
115	TCL1B	Betweenness(Weight): 0.0
116	HEY1	Betweenness(Weight): 0.0
117	GIGYF1	Betweenness(Weight): 0.0
118	CENPF	Betweenness(Weight): 0.0
119	CALM1	Betweenness(Weight): 0.0
120	HMGN2	Betweenness(Weight): 0.0
121	KAT7	Betweenness(Weight): 0.0
122	UBE2S	Betweenness(Weight): 0.0
123	TPX2	Betweenness(Weight): 0.0
124	LINC01015	Betweenness(Weight): 0.0
125	CALR	Betweenness(Weight): 0.0
126	GOLGA4	Betweenness(Weight): 0.0
127	SPPL3	Betweenness(Weight): 0.0
128	PRC1	Betweenness(Weight): 0.0
129	FIP1L1	Betweenness(Weight): 0.0
130	RPL22L1	Betweenness(Weight): 0.0
131	PHGDH	Betweenness(Weight): 0.0
132	PMAIP1	Betweenness(Weight): 0.0
133	AZU1	Betweenness(Weight): 0.0
134	PVALB	Betweenness(Weight): 0.0
135	C1orf233	Betweenness(Weight): 0.0
136	ALDH3A1	Betweenness(Weight): 0.0
137	PIWIL4	Betweenness(Weight): 0.0
138	MSL3	Betweenness(Weight): 0.0
139	MIF4GD	Betweenness(Weight): 0.0
140	SMARCA1	Betweenness(Weight): 0.0
141	SLC9A3R2	Betweenness(Weight): 0.0
142	SIX1	Betweenness(Weight): 0.0
143	NPDC1	Betweenness(Weight): 0.0
144	GSDMD	Betweenness(Weight): 0.0
145	JUND	Betweenness(Weight): 0.0
146	IDH2	Betweenness(Weight): 0.0
147	PARP16	Betweenness(Weight): 0.0
148	DPPA2	Betweenness(Weight): 0.0
149	CYBA	Betweenness(Weight): 0.0
150	PDLIM4	Betweenness(Weight): 0.0
151	ST3GAL4	Betweenness(Weight): 0.0
152	HES4	Betweenness(Weight): 0.0
153	RGS14	Betweenness(Weight): 0.0
154	CEBPB	Betweenness(Weight): 0.0
155	SCT	Betweenness(Weight): 0.0
156	EGR4	Betweenness(Weight): 0.0
157	ID2	Betweenness(Weight): 0.0
158	RNU12	Betweenness(Weight): 0.0
159	C19orf84	Betweenness(Weight): 0.0
160	DSN1	Betweenness(Weight): 0.0
161	NRBP1	Betweenness(Weight): 0.0
162	KANSL1	Betweenness(Weight): 0.0
163	RNPEP	Betweenness(Weight): 0.0
164	KAT5	Betweenness(Weight): 0.0
165	FAAP24	Betweenness(Weight): 0.0
166	ANKRD20A4	Betweenness(Weight): 0.0
167	RNASET2	Betweenness(Weight): 0.0
168	DND1	Betweenness(Weight): 0.0
169	SMOX	Betweenness(Weight): 0.0
170	LINC00911	Betweenness(Weight): 0.0
171	RANBP1	Betweenness(Weight): 0.0
172	MTX2	Betweenness(Weight): 0.0
173	STK31	Betweenness(Weight): 0.0
174	EPB41L4A-AS1	Betweenness(Weight): 0.0
175	HJURP	Betweenness(Weight): 0.0
176	CSTF1	Betweenness(Weight): 0.0
177	ASH2L	Betweenness(Weight): 0.0
178	IGLL1	Betweenness(Weight): 0.0
179	HOXA7	Betweenness(Weight): 0.0
180	UBE2C	Betweenness(Weight): 0.0
181	SOX2	Betweenness(Weight): 0.0
182	TMEM55A	Betweenness(Weight): 0.0
183	RPL9	Betweenness(Weight): 0.0
184	NAMPT	Betweenness(Weight): 0.0
185	SMARCD3	Betweenness(Weight): 0.0
186	SHKBP1	Betweenness(Weight): 0.0
187	NPW	Betweenness(Weight): 0.0
188	PSME1	Betweenness(Weight): 0.0
189	PALM3	Betweenness(Weight): 0.0
190	YWHAH	Betweenness(Weight): 0.0
191	BCAM	Betweenness(Weight): 0.0
192	MXRA7	Betweenness(Weight): 0.0
193	BAX	Betweenness(Weight): 0.0
194	MACROD1	Betweenness(Weight): 0.0
195	TUBA1C	Betweenness(Weight): 0.0
196	AK5	Betweenness(Weight): 0.0
197	CD81	Betweenness(Weight): 0.0
198	SFRP1	Betweenness(Weight): 0.0
199	CYB5A	Betweenness(Weight): 0.0
200	GAMT	Betweenness(Weight): 0.0
201	LRRFIP1	Betweenness(Weight): 0.0
202	IRF2BPL	Betweenness(Weight): 0.0
203	TUBA1A	Betweenness(Weight): 0.0
204	TPM1	Betweenness(Weight): 0.0
205	ZFP36L2	Betweenness(Weight): 0.0
206	MALAT1	Betweenness(Weight): 0.0
207	NANOS3	Betweenness(Weight): 0.0
208	NFKBIA	Betweenness(Weight): 0.0
209	RMI2	Betweenness(Weight): 0.0
210	STRA13	Betweenness(Weight): 0.0
211	CENPK	Betweenness(Weight): 0.0
212	SLBP	Betweenness(Weight): 0.0
213	FAM213A	Betweenness(Weight): 0.0
214	PTPN12	Betweenness(Weight): 0.0
215	GAGE1	Betweenness(Weight): 0.0
216	TRMT6	Betweenness(Weight): 0.0
217	DEK	Betweenness(Weight): 0.0
218	CTCFL	Betweenness(Weight): 0.0
219	NME4	Betweenness(Weight): 0.0
220	CSTB	Betweenness(Weight): 0.0
221	MYBL2	Betweenness(Weight): 0.0
222	PTS	Betweenness(Weight): 0.0
223	CCDC109B	Betweenness(Weight): 0.0
224	TSPYL2	Betweenness(Weight): 0.0
225	CLPTM1L	Betweenness(Weight): 0.0
226	PRIM1	Betweenness(Weight): 0.0
227	CD9	Betweenness(Weight): 0.0
228	SNX6	Betweenness(Weight): 0.0
229	HPRT1	Betweenness(Weight): 0.0
230	LSM5	Betweenness(Weight): 0.0
231	RAMP2	Betweenness(Weight): 0.0
232	POLR2J3	Betweenness(Weight): 0.0
233	PASD1	Betweenness(Weight): 0.0
234	UNG	Betweenness(Weight): 0.0
235	LAPTM4B	Betweenness(Weight): 0.0
236	CHAF1A	Betweenness(Weight): 0.0
237	CDT1	Betweenness(Weight): 0.0
238	E2F1	Betweenness(Weight): 0.0
239	DPEP3	Betweenness(Weight): 0.0
240	HELLS	Betweenness(Weight): 0.0
241	ATP2B1	Betweenness(Weight): 0.0
242	PAGE1	Betweenness(Weight): 0.0
243	PRSS50	Betweenness(Weight): 0.0
244	DMRT1	Betweenness(Weight): 0.0
245	L1TD1	Betweenness(Weight): 0.0
246	CLSPN	Betweenness(Weight): 0.0
247	ASB9	Betweenness(Weight): 0.0
248	PLK1	Betweenness(Weight): 0.0
249	NUSAP1	Betweenness(Weight): 0.0
250	TUBB4B	Betweenness(Weight): 0.0
251	SOX18	Betweenness(Weight): 0.0
252	ARHGAP15	Betweenness(Weight): 0.0
253	FAM118B	Betweenness(Weight): 0.0
254	PKM	Betweenness(Weight): 0.0
255	TUBA3E	Betweenness(Weight): 0.0
256	NEFM	Betweenness(Weight): 0.0
257	S100A10	Betweenness(Weight): 0.0
258	KPNA2	Betweenness(Weight): 0.0
259	FHL1	Betweenness(Weight): 0.0
260	TXNIP	Betweenness(Weight): 0.0
261	CLU	Betweenness(Weight): 0.0
262	SPSB4	Betweenness(Weight): 0.0
263	EIF2B2	Betweenness(Weight): 0.0
264	GNPNAT1	Betweenness(Weight): 0.0
265	WWC2-AS2	Betweenness(Weight): 0.0
266	CARTPT	Betweenness(Weight): 0.0
267	GYG1	Betweenness(Weight): 0.0
268	LINC00588	Betweenness(Weight): 0.0
269	LINC01309	Betweenness(Weight): 0.0
270	MRGPRG-AS1	Betweenness(Weight): 0.0
271	DHRS4	Betweenness(Weight): 0.0
272	AURKA	Betweenness(Weight): 0.0
273	RASGEF1C	Betweenness(Weight): 0.0
274	G0S2	Betweenness(Weight): 0.0
275	VCX3A	Betweenness(Weight): 0.0
276	TEX12	Betweenness(Weight): 0.0
277	FMR1NB	Betweenness(Weight): 0.0
278	WBSCR22	Betweenness(Weight): 0.0
279	TRAPPC8	Betweenness(Weight): 0.0
280	TUBA3D	Betweenness(Weight): 0.0
281	TP53I13	Betweenness(Weight): 0.0
282	MRPS9	Betweenness(Weight): 0.0
283	FBXO43	Betweenness(Weight): 0.0
284	MRPL43	Betweenness(Weight): 0.0
285	CDK5RAP3	Betweenness(Weight): 0.0
286	TOE1	Betweenness(Weight): 0.0
287	SFMBT1	Betweenness(Weight): 0.0
288	ZNF692	Betweenness(Weight): 0.0
289	STK17A	Betweenness(Weight): 0.0
290	RAD51	Betweenness(Weight): 0.0
291	HIRIP3	Betweenness(Weight): 0.0
292	VPS8	Betweenness(Weight): 0.0
293	OIP5	Betweenness(Weight): 0.0
294	PCDHB14	Betweenness(Weight): 0.0
295	RIC8A	Betweenness(Weight): 0.0
296	ANKRD36	Betweenness(Weight): 0.0
297	DEPDC1B	Betweenness(Weight): 0.0
298	CEP55	Betweenness(Weight): 0.0
299	RACGAP1	Betweenness(Weight): 0.0
300	RNF20	Betweenness(Weight): 0.0
301	ANKRD30A	Betweenness(Weight): 0.0
302	SGK494	Betweenness(Weight): 0.0
303	FAM95B1	Betweenness(Weight): 0.0
304	TBPL1	Betweenness(Weight): 0.0
305	CERS3	Betweenness(Weight): 0.0
306	CDKN2D	Betweenness(Weight): 0.0
307	BNIP1	Betweenness(Weight): 0.0
308	REEP4	Betweenness(Weight): 0.0
309	ZKSCAN4	Betweenness(Weight): 0.0
310	COPRS	Betweenness(Weight): 0.0
311	ALG8	Betweenness(Weight): 0.0
312	CDK20	Betweenness(Weight): 0.0
313	SYNGR4	Betweenness(Weight): 0.0
314	RAE1	Betweenness(Weight): 0.0
315	PDRG1	Betweenness(Weight): 0.0
316	DKFZP434H168	Betweenness(Weight): 0.0
317	CDK1	Betweenness(Weight): 0.0
318	TPR	Betweenness(Weight): 0.0
319	PCDHB2	Betweenness(Weight): 0.0
320	EFEMP2	Betweenness(Weight): 0.0
321	TXNDC12	Betweenness(Weight): 0.0
322	DNAJB2	Betweenness(Weight): 0.0
323	GJA8	Betweenness(Weight): 0.0
324	BAZ2B	Betweenness(Weight): 0.0
325	GPX1	Betweenness(Weight): 0.0
326	ANKRD18B	Betweenness(Weight): 0.0
327	DIXDC1	Betweenness(Weight): 0.0
328	SGK1	Betweenness(Weight): 0.0
329	NCAPH	Betweenness(Weight): 0.0
330	CD320	Betweenness(Weight): 0.0
331	PSMD5-AS1	Betweenness(Weight): 0.0
332	C4orf46	Betweenness(Weight): 0.0
333	ANKRD62	Betweenness(Weight): 0.0
334	PRKAB1	Betweenness(Weight): 0.0
335	LINC01360	Betweenness(Weight): 0.0
336	ANKRD18A	Betweenness(Weight): 0.0
337	RASSF1	Betweenness(Weight): 0.0
338	CCDC86	Betweenness(Weight): 0.0
339	PCDH17	Betweenness(Weight): 0.0
340	TPTE	Betweenness(Weight): 0.0
341	TM2D1	Betweenness(Weight): 0.0
342	CCP110	Betweenness(Weight): 0.0
343	LINC00964	Betweenness(Weight): 0.0
344	PLIN3	Betweenness(Weight): 0.0
345	SCAMP1-AS1	Betweenness(Weight): 0.0
346	POU5F2	Betweenness(Weight): 0.0
347	SPINT2	Betweenness(Weight): 0.0
348	KPNB1	Betweenness(Weight): 0.0
349	USP3-AS1	Betweenness(Weight): 0.0
350	DNAI1	Betweenness(Weight): 0.0
351	SMDT1	Betweenness(Weight): 0.0
352	FAM225A	Betweenness(Weight): 0.0
353	SSR2	Betweenness(Weight): 0.0
354	FAM225B	Betweenness(Weight): 0.0
355	PKIG	Betweenness(Weight): 0.0
356	B3GALT4	Betweenness(Weight): 0.0
357	PINK1	Betweenness(Weight): 0.0
358	MBD1	Betweenness(Weight): 0.0
359	ANKRD30B	Betweenness(Weight): 0.0
360	GLB1L	Betweenness(Weight): 0.0
361	IFT74	Betweenness(Weight): 0.0
362	EID3	Betweenness(Weight): 0.0
363	SLC2A5	Betweenness(Weight): 0.0
364	CNTRL	Betweenness(Weight): 0.0
365	ERICH3-AS1	Betweenness(Weight): 0.0
366	CDCA3	Betweenness(Weight): 0.0
367	OVOL2	Betweenness(Weight): 0.0
368	PSMA8	Betweenness(Weight): 0.0
369	LINC01431	Betweenness(Weight): 0.0
370	C3orf62	Betweenness(Weight): 0.0
371	PCID2	Betweenness(Weight): 0.0
372	CAPN11	Betweenness(Weight): 0.0
373	POTEC	Betweenness(Weight): 0.0
374	FAM174A	Betweenness(Weight): 0.0
375	ANKRD30BL	Betweenness(Weight): 0.0
376	ISOC2	Betweenness(Weight): 0.0
377	KRT72	Betweenness(Weight): 0.0
378	CEP126	Betweenness(Weight): 0.0
379	ZNF689	Betweenness(Weight): 0.0
380	PENK	Betweenness(Weight): 0.0
381	C16orf71	Betweenness(Weight): 0.0
382	ZNF793-AS1	Betweenness(Weight): 0.0
383	TMEM99	Betweenness(Weight): 0.0
384	C1orf94	Betweenness(Weight): 0.0
385	EIF5AL1	Betweenness(Weight): 0.0
386	BIRC8	Betweenness(Weight): 0.0
387	ART5	Betweenness(Weight): 0.0
388	PMM1	Betweenness(Weight): 0.0
389	TYMS	Betweenness(Weight): 0.0
390	PROK2	Betweenness(Weight): 0.0
391	EXD2	Betweenness(Weight): 0.0
392	CYB5D2	Betweenness(Weight): 0.0
393	SLC2A14	Betweenness(Weight): 0.0
394	SLC25A19	Betweenness(Weight): 0.0
395	C15orf48	Betweenness(Weight): 0.0
396	NUF2	Betweenness(Weight): 0.0
397	PCDHB5	Betweenness(Weight): 0.0
398	PIWIL1	Betweenness(Weight): 0.0
399	RNMTL1	Betweenness(Weight): 0.0
400	MGAT4D	Betweenness(Weight): 0.0
401	POM121L12	Betweenness(Weight): 0.0
402	MLLT10	Betweenness(Weight): 0.0
403	SLC25A31	Betweenness(Weight): 0.0
404	RFX4	Betweenness(Weight): 0.0
405	AKAP12	Betweenness(Weight): 0.0
406	CIAPIN1	Betweenness(Weight): 0.0
407	RNFT1	Betweenness(Weight): 0.0
408	AARD	Betweenness(Weight): 0.0
409	KLB	Betweenness(Weight): 0.0
410	GULP1	Betweenness(Weight): 0.0
411	WDR87	Betweenness(Weight): 0.0
412	LDHAL6B	Betweenness(Weight): 0.0
413	C9orf57	Betweenness(Weight): 0.0
414	TUBA1B	Betweenness(Weight): 0.0
415	TPT1	Betweenness(Weight): 0.0
416	CDKN3	Betweenness(Weight): 0.0
417	CALM3	Betweenness(Weight): 0.0
418	APRT	Betweenness(Weight): 0.0
419	TNIP2	Betweenness(Weight): 0.0
420	PRR5	Betweenness(Weight): 0.0
421	HSPD1	Betweenness(Weight): 0.0
422	TNNT1	Betweenness(Weight): 0.0
423	PKN1	Betweenness(Weight): 0.0
424	AKR1B1	Betweenness(Weight): 0.0
425	TCF3	Betweenness(Weight): 0.0
426	TMEM14B	Betweenness(Weight): 0.0
427	MXD4	Betweenness(Weight): 0.0
428	LSM7	Betweenness(Weight): 0.0
429	RHOC	Betweenness(Weight): 0.0
430	ATIC	Betweenness(Weight): 0.0
431	YWHAB	Betweenness(Weight): 0.0
432	AKR1A1	Betweenness(Weight): 0.0
433	GRN	Betweenness(Weight): 0.0
434	KPNA5	Betweenness(Weight): 0.0
435	SIGIRR	Betweenness(Weight): 0.0
436	PAGE2	Betweenness(Weight): 0.0
437	METTL5	Betweenness(Weight): 0.0
438	PRDX1	Betweenness(Weight): 0.0
439	HVCN1	Betweenness(Weight): 0.0
440	OVOL1	Betweenness(Weight): 0.0
441	SLC25A5	Betweenness(Weight): 0.0
442	SRM	Betweenness(Weight): 0.0
443	ESX1	Betweenness(Weight): 0.0
444	LSM2	Betweenness(Weight): 0.0
445	PPP1CA	Betweenness(Weight): 0.0
446	TYSND1	Betweenness(Weight): 0.0
447	RGMA	Betweenness(Weight): 0.0
448	SAYSD1	Betweenness(Weight): 0.0
449	COTL1	Betweenness(Weight): 0.0
450	LY6E	Betweenness(Weight): 0.0
451	NEIL2	Betweenness(Weight): 0.0
452	DYDC1	Betweenness(Weight): 0.0
453	EPCAM	Betweenness(Weight): 0.0
454	LPIN2	Betweenness(Weight): 0.0
455	ENHO	Betweenness(Weight): 0.0
456	SAP25	Betweenness(Weight): 0.0
457	ZC2HC1C	Betweenness(Weight): 0.0
458	NENF	Betweenness(Weight): 0.0
459	HYAL2	Betweenness(Weight): 0.0
460	RBM3	Betweenness(Weight): 0.0
461	NUDT14	Betweenness(Weight): 0.0
462	NAE1	Betweenness(Weight): 0.0
463	CCDC42	Betweenness(Weight): 0.0
464	RABGGTA	Betweenness(Weight): 0.0
465	ITGB1	Betweenness(Weight): 0.0
466	TMPRSS12	Betweenness(Weight): 0.0
467	HSPB1	Betweenness(Weight): 0.0
468	ACTB	Betweenness(Weight): 0.0
469	SNAPC2	Betweenness(Weight): 0.0
470	RHOXF1	Betweenness(Weight): 0.0
471	GLIPR1L1	Betweenness(Weight): 0.0
472	LDHB	Betweenness(Weight): 0.0
473	ANP32B	Betweenness(Weight): 0.0
474	PRAME	Betweenness(Weight): 0.0
475	SNHG7	Betweenness(Weight): 0.0
476	NEK2	Betweenness(Weight): 0.0
477	PAFAH1B3	Betweenness(Weight): 0.0
478	SERPINE2	Betweenness(Weight): 0.0
479	TUBB	Betweenness(Weight): 0.0
480	SERPINI1	Betweenness(Weight): 0.0
481	PFN1	Betweenness(Weight): 0.0
482	SMS	Betweenness(Weight): 0.0
483	NCL	Betweenness(Weight): 0.0
484	LINC01016	Betweenness(Weight): 0.0
485	PRELID1	Betweenness(Weight): 0.0
486	PCSK1N	Betweenness(Weight): 0.0
487	MARCKSL1	Betweenness(Weight): 0.0
488	LINC01511	Betweenness(Weight): 0.0
489	C11orf31	Betweenness(Weight): 0.0
490	KRT18	Betweenness(Weight): 0.0
491	RPS4Y1	Betweenness(Weight): 0.0
492	CPVL	Betweenness(Weight): 0.0
493	LMO4	Betweenness(Weight): 0.0
494	LIN7B	Betweenness(Weight): 0.0
495	RGCC	Betweenness(Weight): 0.0
496	RPL18	Betweenness(Weight): 0.0
497	ANXA11	Betweenness(Weight): 0.0
498	RNF113B	Betweenness(Weight): 0.0
499	IGFBP2	Betweenness(Weight): 0.0
500	MAGEB2	Betweenness(Weight): 0.0
501	AES	Betweenness(Weight): 0.0
502	DUSP5	Betweenness(Weight): 0.0
503	SOX4	Betweenness(Weight): 0.0
504	MORC2-AS1	Betweenness(Weight): 0.0
505	SPAG6	Betweenness(Weight): 0.0
506	RAC3	Betweenness(Weight): 0.0
507	FSD1	Betweenness(Weight): 0.0
508	TLE1	Betweenness(Weight): 0.0
509	CIRBP	Betweenness(Weight): 0.0
510	GSTP1	Betweenness(Weight): 0.0
511	PABPC4	Betweenness(Weight): 0.0
512	VCX3B	Betweenness(Weight): 0.0
513	TKTL1	Betweenness(Weight): 0.0
514	PRKCDBP	Betweenness(Weight): 0.0
515	ITM2B	Betweenness(Weight): 0.0
516	CLGN	Betweenness(Weight): 0.0
517	MRPL34	Betweenness(Weight): 0.0
518	LYAR	Betweenness(Weight): 0.0
519	CCDC106	Betweenness(Weight): 0.0
520	ITGB6	Betweenness(Weight): 0.0
521	RPS4X	Betweenness(Weight): 0.0
522	MAGEA4	Betweenness(Weight): 0.0
523	RPL39	Betweenness(Weight): 0.0
524	UTF1	Betweenness(Weight): 0.0
525	RPL10	Betweenness(Weight): 0.0
526	ASRGL1	Betweenness(Weight): 0.0
527	ID4	Betweenness(Weight): 0.0
528	ID1	Betweenness(Weight): 0.0
529	FTL	Betweenness(Weight): 0.0
530	GAGE2A	Betweenness(Weight): 0.0
531	CST3	Betweenness(Weight): 0.0
532	DLK1	Betweenness(Weight): 0.0
